# Supplementary material
Source: MDPI journal article supplement (https://www.mdpi.com/2077-1312/11/11/2195)

---

## Supplementary Materials

**Table S1.** Diffraction peaks location of XRD of strain Ery5 and Ery15

| Peaks | Strain Ery5 | Strain Ery15 |
|-------|-------------|--------------|
| 1     | 24.11804    | 24.11804     |
| 2     | 31.12594    | 31.12594     |
| 3     | 37.35518    | 37.33469     |
| 4     | 41.20748    | 41.18699     |
| 5     | 44.95732    | 44.93683     |
| 6     | 49.36287    | 49.38336     |
| 7     | 50.98166    | 49.38336     |
| 8     | 51.30951    | 51.30951     |
| 9     | 58.89116    | 58.85017     |
| 10    | 59.81325    | 59.79276     |
| 11    | 63.48112    | 63.48112     |
| 12    | 64.8745     | 64.8745      |
| 13    | 67.35391    | 67.33342     |

**Table S2.** Genomic features of Ery5 and Ery15.

|              | Strain Ery5 | Strain Ery15 |
|--------------|-------------|--------------|
| Size (bp)    | 3836718     | 3633189      |
| G+C (%)      | 62.5        | 62.2         |
| Coding genes | 3646        | 3570         |
| Protein      | 3525        | 3463         |
| rRNA         | 6           | 6            |
| tRNA         | 50          | 50           |
| Accession    | CP087587    | CP087588     |

**Table S3.** The 16S rRNA gene sequence similarities between strains Ery5, Ery15 and the type strains of the genus *Croceicoccus*.

| Strains                                       | Similarity (%) |              |
|-----------------------------------------------|----------------|--------------|
|                                               | Strain Ery5    | Strain Ery15 |
| 1. Strain Ery5                                | <b>100</b>     | <b>100</b>   |
| 2. Strain Ery15                               | <b>100</b>     | <b>100</b>   |
| 3. <i>C. marinus</i> E4A9 <sup>T</sup>        | 98.1           | 98.1         |
| 4. <i>C. mobilis</i> Ery22 <sup>T</sup>       | 98.1           | 98.1         |
| 5. <i>C. pelagius</i> Ery9 <sup>T</sup>       | 96.5           | 96.5         |
| 6. <i>C. bisphenolivorans</i> H4 <sup>T</sup> | 96.3           | 96.3         |
| 7. <i>C. ponticola</i> GM-16 <sup>T</sup>     | 96.0           | 96.0         |
| 8. <i>C. naphthovorans</i> PQ-2 <sup>T</sup>  | 95.8           | 95.8         |
| 9. <i>C. sediminis</i> S2-4-2 <sup>T</sup>    | 95.7           | 95.7         |

**Table S4.** The ANI values and the genome-to-genome distance of strains Ery5, Ery15 and the type strains of their closely relatives.

| Strains                                                 | ANI values (%) |        | In silico DDH (%) |        |
|---------------------------------------------------------|----------------|--------|-------------------|--------|
|                                                         | Strain         | Strain | Strain            | Strain |
|                                                         | Ery5           | Ery15  | Ery5              | Ery15  |
| 1. Strain Ery5 (CP087587)                               | /              |        | /                 |        |
| 2. Strain Ery15 (CP087588)                              | 95.5           | /      | 63.8              | /      |
| 3. <i>C. marinus</i> E4A9 <sup>T</sup> (LYPP000000000)  | 82.9           | 83.0   | 25.9              | 25.6   |
| 4. <i>C. mobilis</i> Ery22 <sup>T</sup> (LYWZ000000000) | 79.2           | 78.6   | 21.6              | 21.3   |
| 5. <i>C. pelagius</i> Ery9 <sup>T</sup> (LYWY000000000) | 75.2           | 77.0   | 20.6              | 24.0   |

**Table S5.** Annotated genes with putative function in resistance to heavy metals between strains Ery5 and Ery15.

| Related to                | Function annotation                                   | Ery5 | Ery15 |
|---------------------------|-------------------------------------------------------|------|-------|
| Transcriptional regulator | Transcriptional regulator, MerR family                | 3    | 3     |
|                           | Nickel responsive regulator NikR                      | 1    | 1     |
|                           | Heavy metal resistance transcriptional regulator HmrR | 0    | 1     |
| RND efflux system         | RND efflux system (including CzcCBA)                  | 18   | 20    |
|                           | Copper/silver efflux RND transporter (CusCBA)         | 3    | 6     |
| P-type ATPase             | Lead, cadmium, zinc and mercury transporting ATPase   | 5    | 6     |
| Cation transporter        | Cobalt/zinc/cadmium resistance protein CzcD           | 6    | 9     |
|                           | Magnesium and cobalt efflux protein CorC              | 2    | 4     |
| Copper                    | CopG protein                                          | 2    | 3     |
|                           | Copper resistance protein B                           | 4    | 4     |
|                           | Periplasmic divalent cation tolerance protein CutA    | 0    | 1     |
|                           | Copper homeostasis protein CutE                       | 1    | 1     |
| Manganese                 | Multicopper oxidase                                   | 7    | 6     |
| Mercury                   | Periplasmic mercury (+2) binding protein, MerP        | 0    | 1     |
|                           | Mercuric transport protein MerT                       | 0    | 1     |
|                           | Mercuric resistance operon regulatory protein MerR    | 0    | 1     |
| Others                    | HoxN/HupN/NixA family nickel/cobalt transporter       | 1    | 0     |
|                           | Nickel-cobalt-cadmium resistance protein nccX         | 1    | 3     |
|                           | Hypothetical protein involved in heavy metal export   | 1    | 4     |

**Figure S1.** Locations of the two sampling sites of strains Ery5 and Ery15.

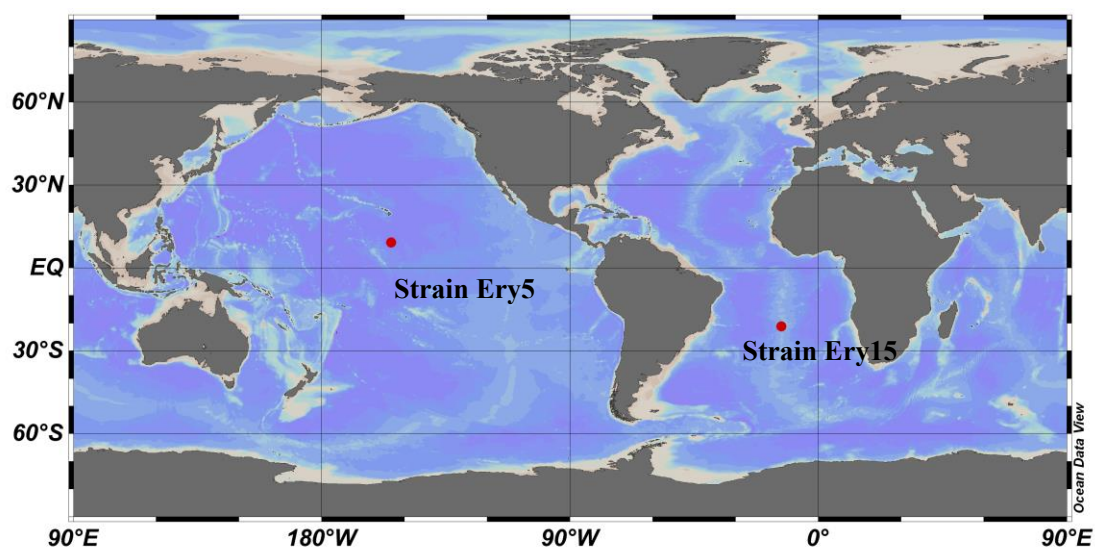

**Figure S2.** Removal efficiency of  $\text{Mn}^{2+}$  in strains Ery5 (a) and strain Ery15 (b).

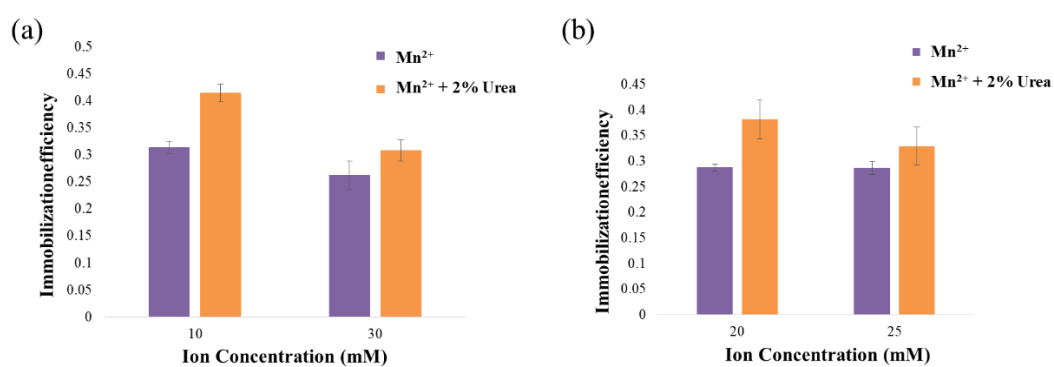

**Figure S3.** XRD images of strains Ery5 (a) and strain Ery15 (b).

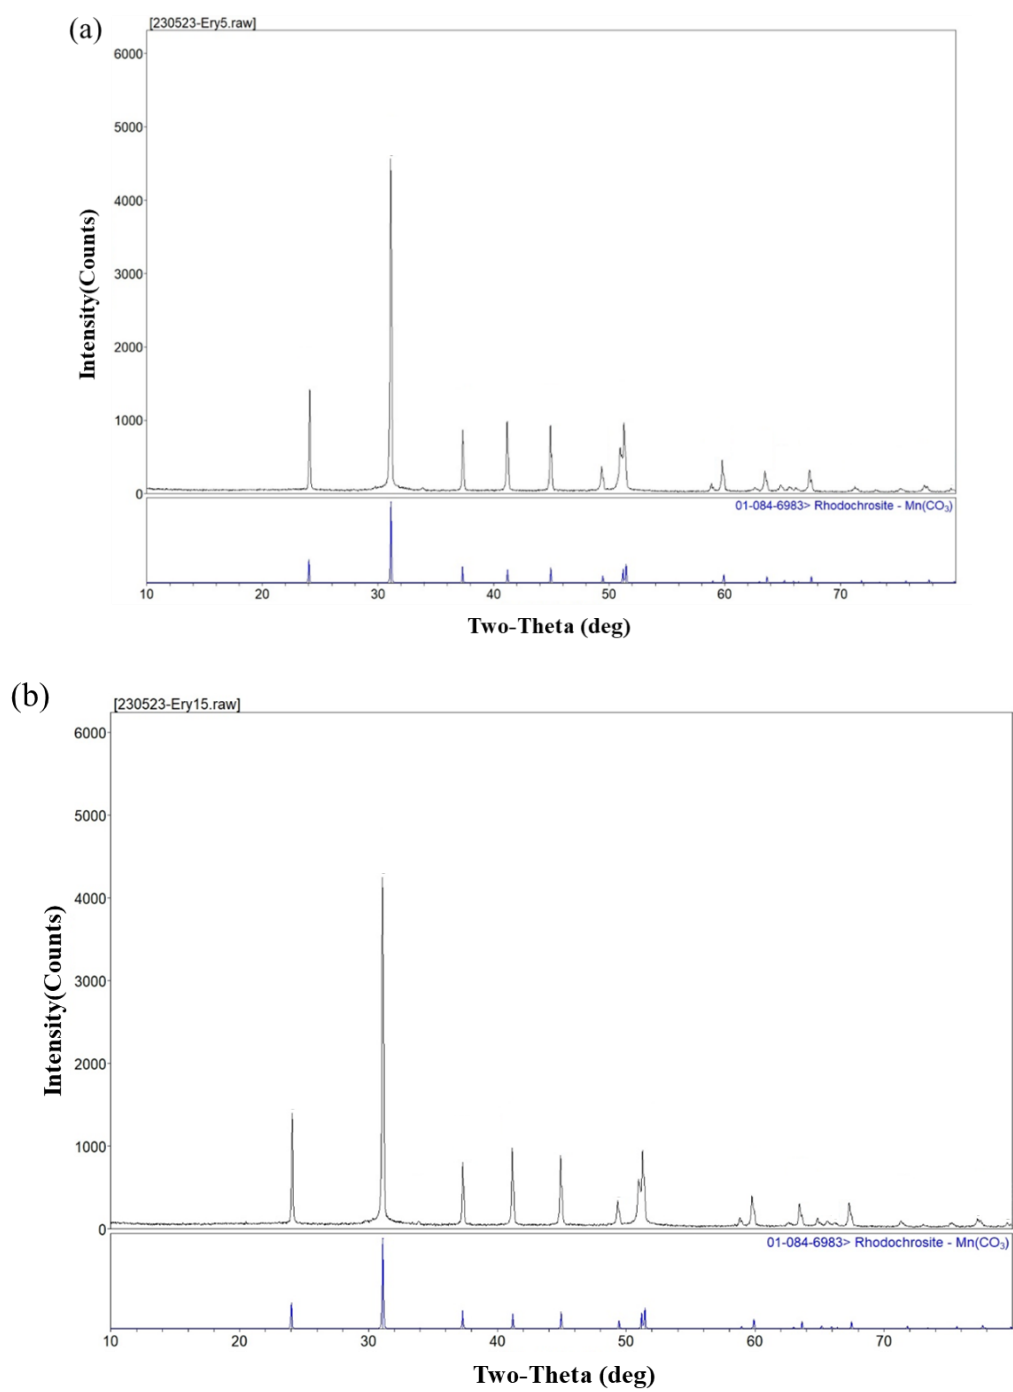

**Figure S4.** Transmission electron micrographs of strains Ery5 and Ery15. (a) the cell morphology of strain Ery5; (b) the ultrastructure of strains Ery5; (c) the cell morphology of strains Ery15; (d) the ultrastructure of strains Ery15.

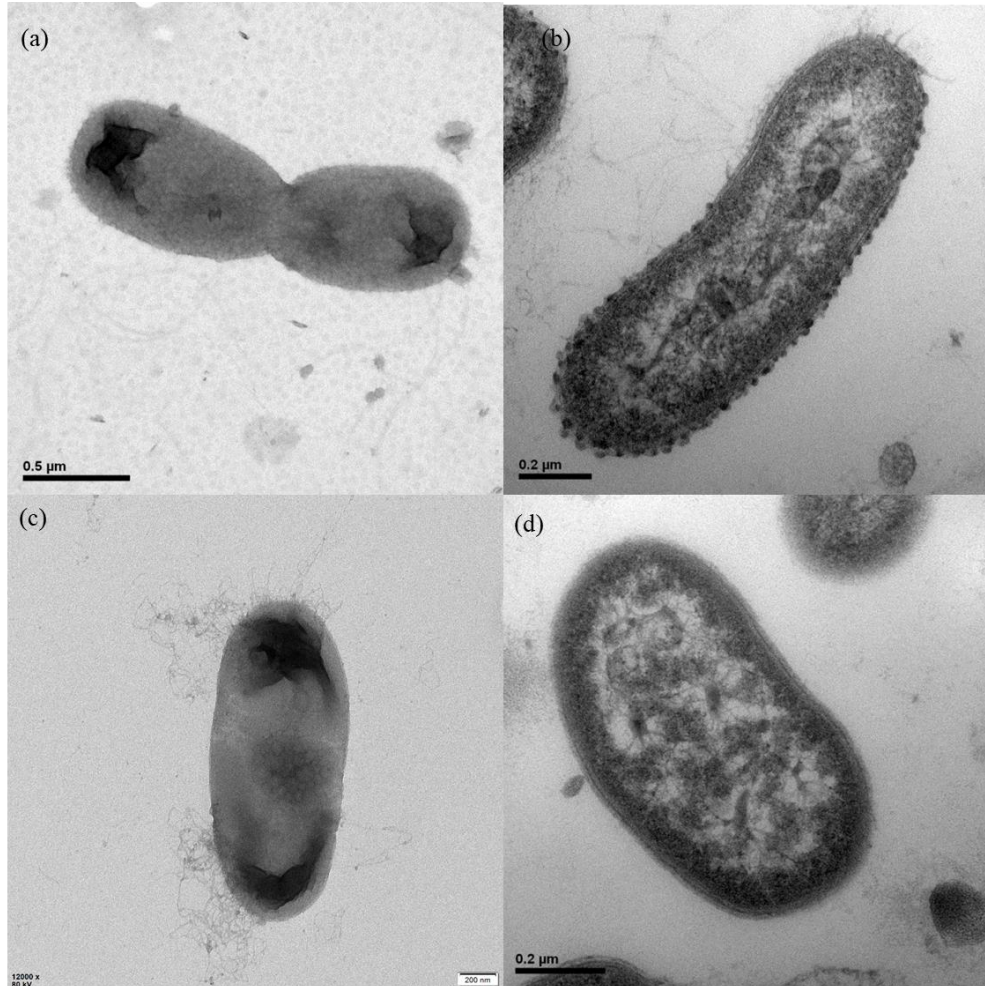

**Figure S5.** Thin-layer chromatograms after staining with molybdatophosphoric acid showing the total polar lipid profiles of two strains. (a) Strain Ery5; (b) Strain Ery15. PC, Phosphatidylcholine; PE, phosphatidylethanolamine; PG, phosphatidylglycerol; SGL, sphingoglycolipid; PL, phospholipid; GL, glycolipid; AL, aminolipid; L, lipid.

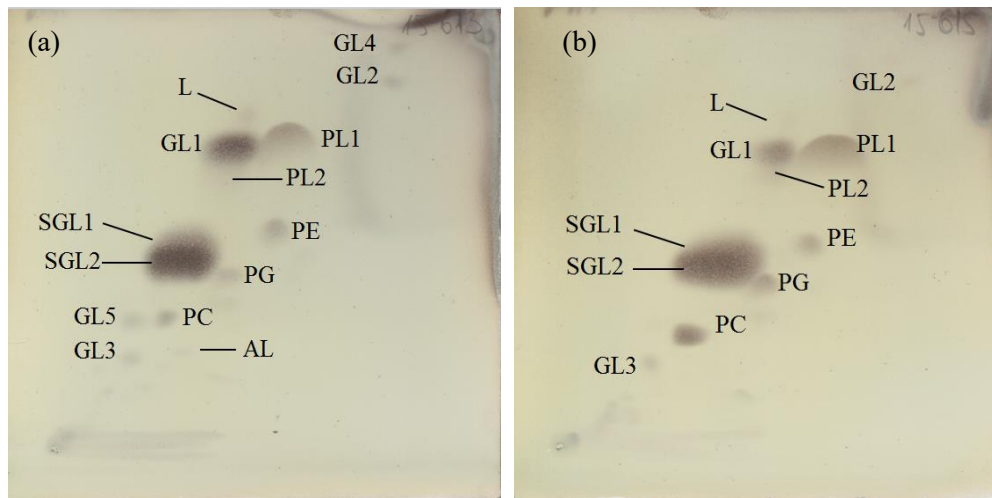

**Figure S6.** Maximum-likelihood tree based on concatenated 844 protein sequences from genomic sequences showing the phylogenetic relationship of the strains Ery5 and Ery15 with the related taxa. Bootstrap values based on 100 replications. Bar, 0.050 substitutions per amino acid position. *Sphingosinicella microcystinivorans* DSM 19791<sup>T</sup> (GenBank accession number is RBWX000000000) was used as outgroup.

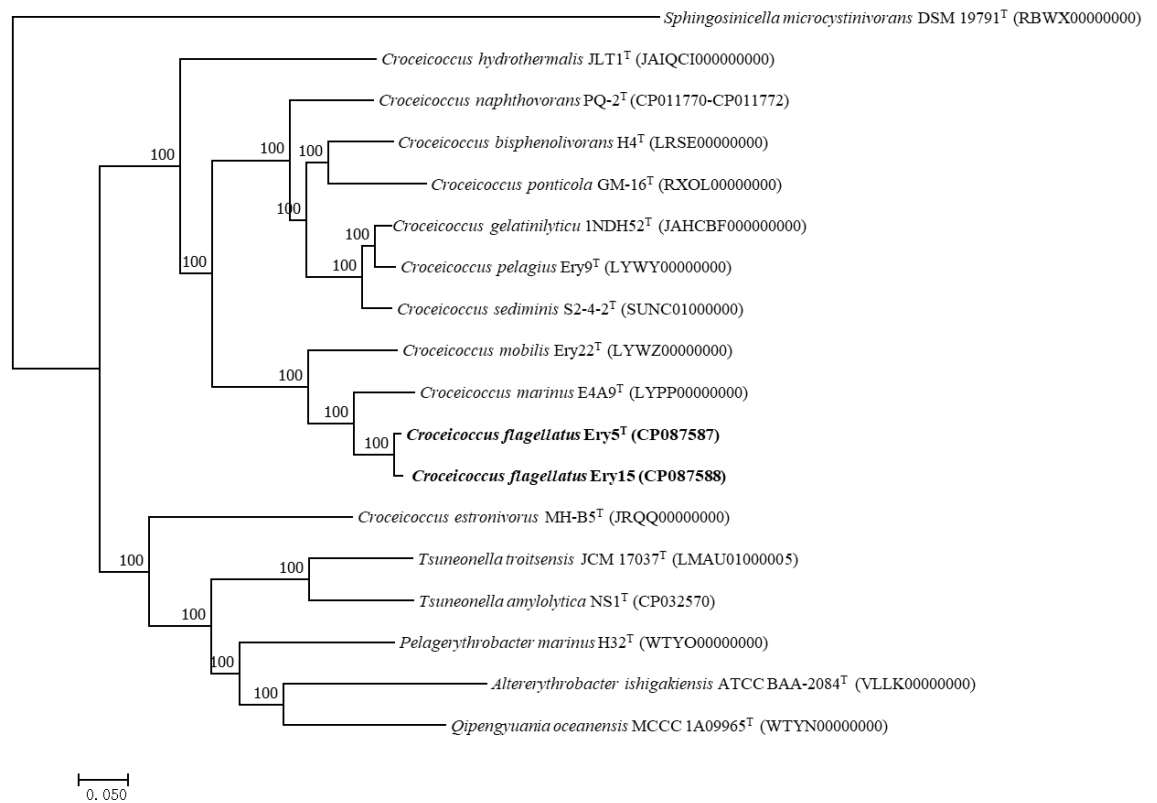



**Figure S7.** Comparison of COG profile of unique proteins.

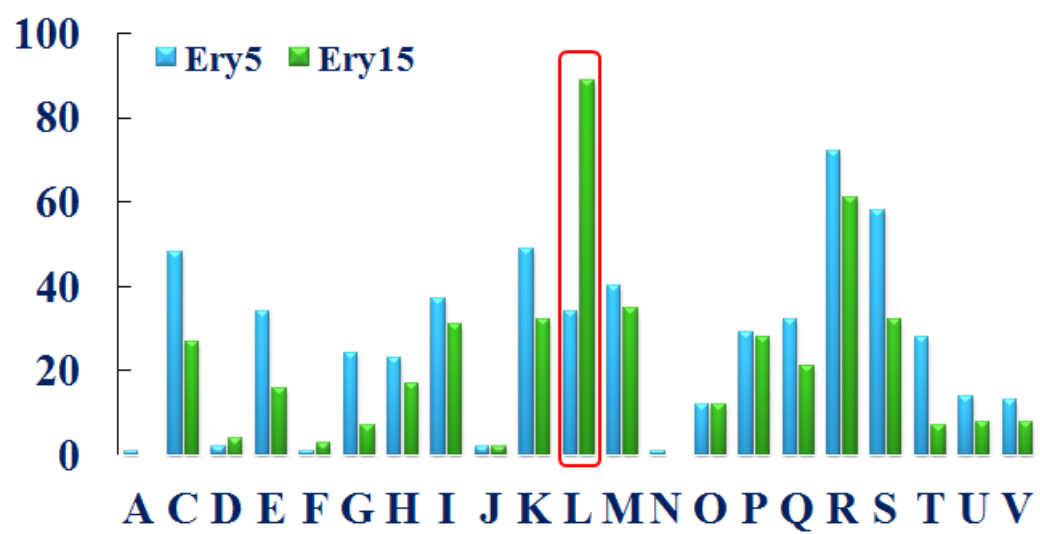

Supplement: s1 [file s1]
